# Supplementary material for: Inhibition of Trpv4 rescues circuit and social deficits unmasked by acute inflammatory response in a Shank3 mouse model of Autism
Source: PubMed Central journal article supplement (PMC9126815; doi:10.1038/s41380-021-01427-0), 2022-01-12
Supplement: 41380_2021_1427_MOESM1_ESM.pdf [file 41380_2021_1427_MOESM1_ESM.pdf]

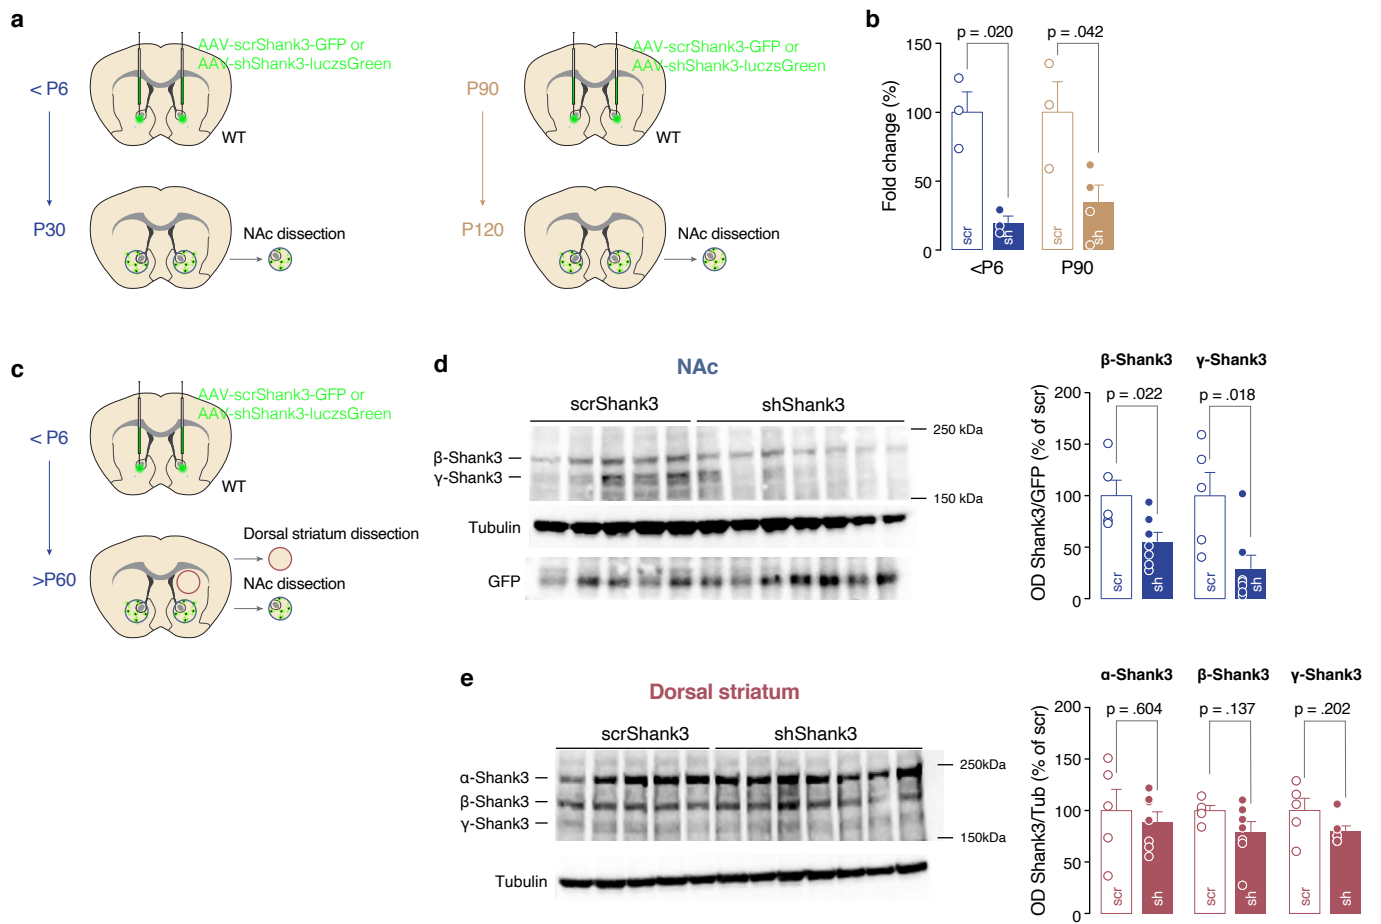

Sup. Figure 1 - Tzanoulinou, Musardo, Contestabile et al

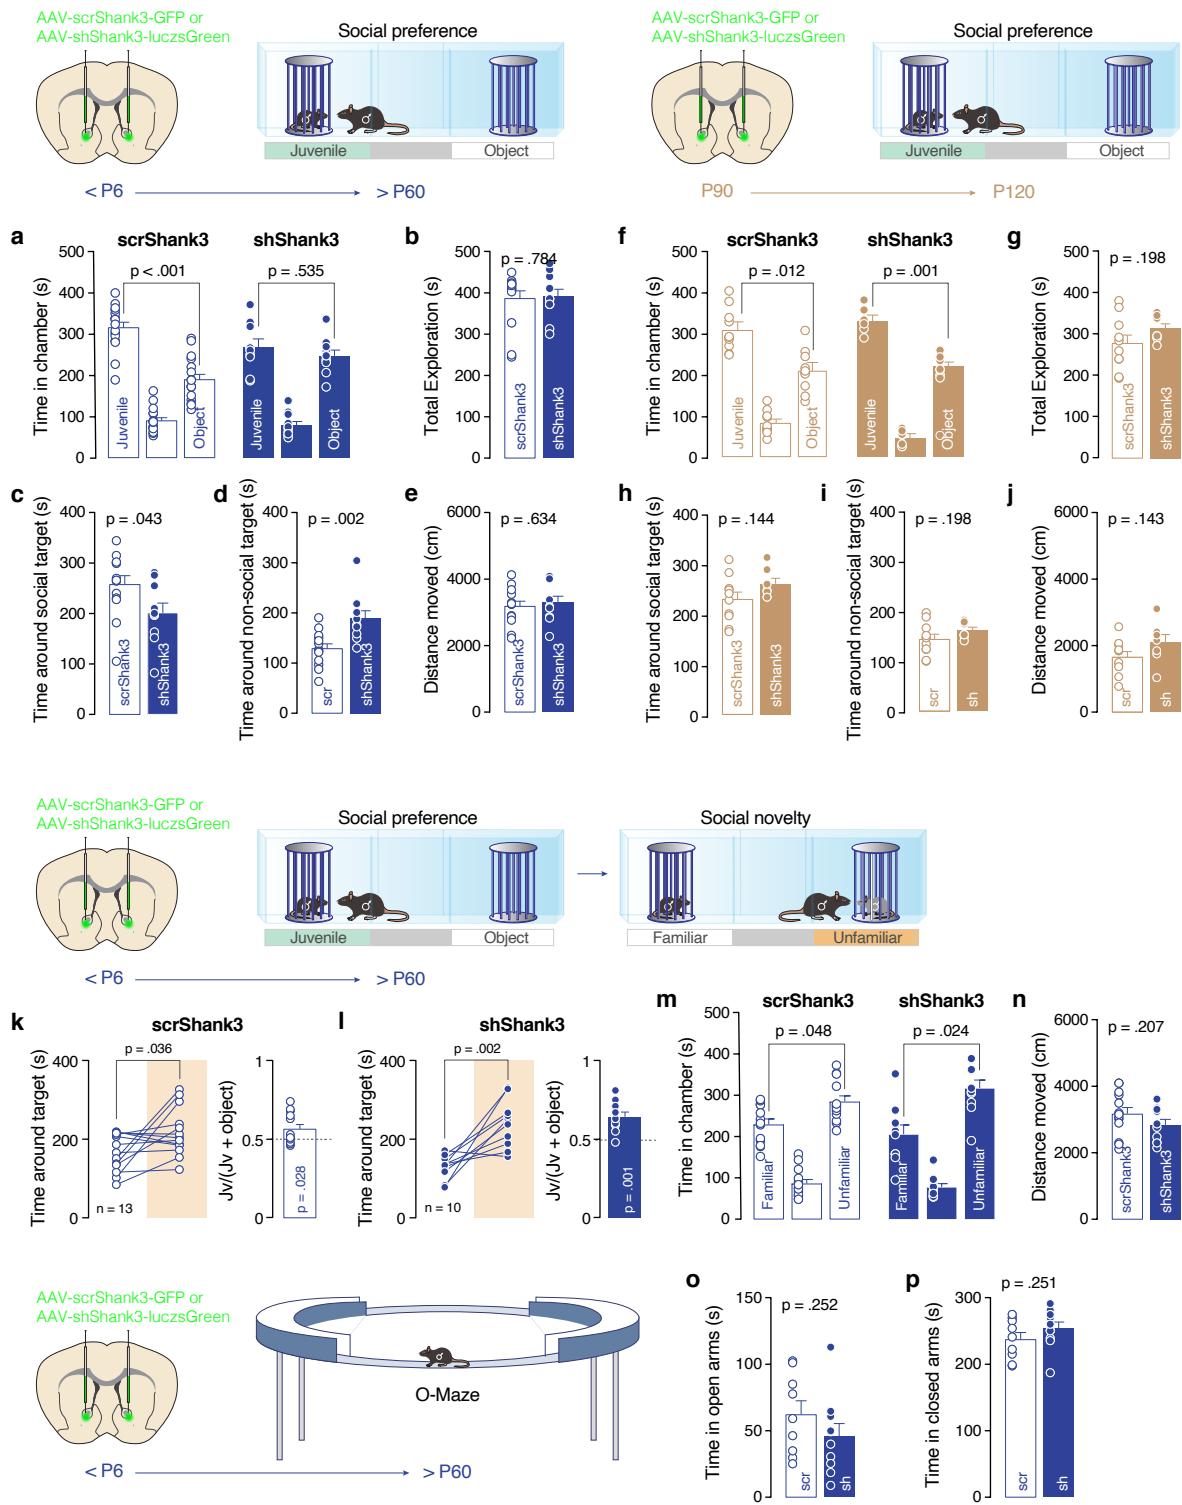

Sup. Figure 2 - Tzanoulinou, Musardo, Contestabile et al

### Whole-cell patch clamp in Picrotoxin and Kynurenic Acid

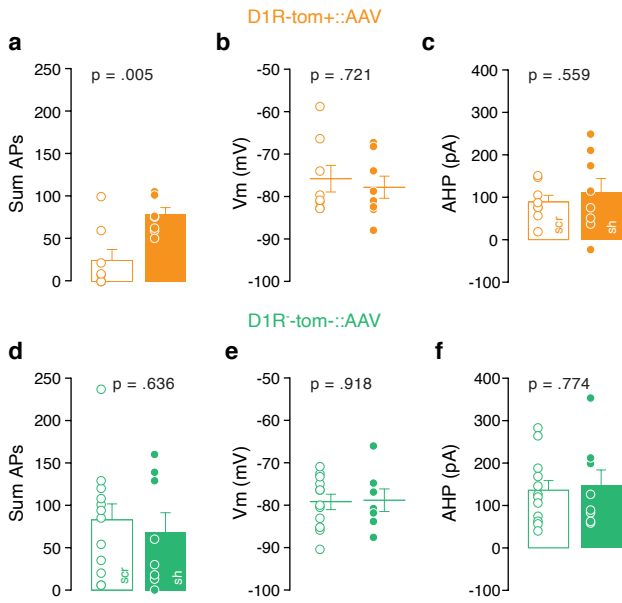

### Whole-cell patch clamp in aCSF

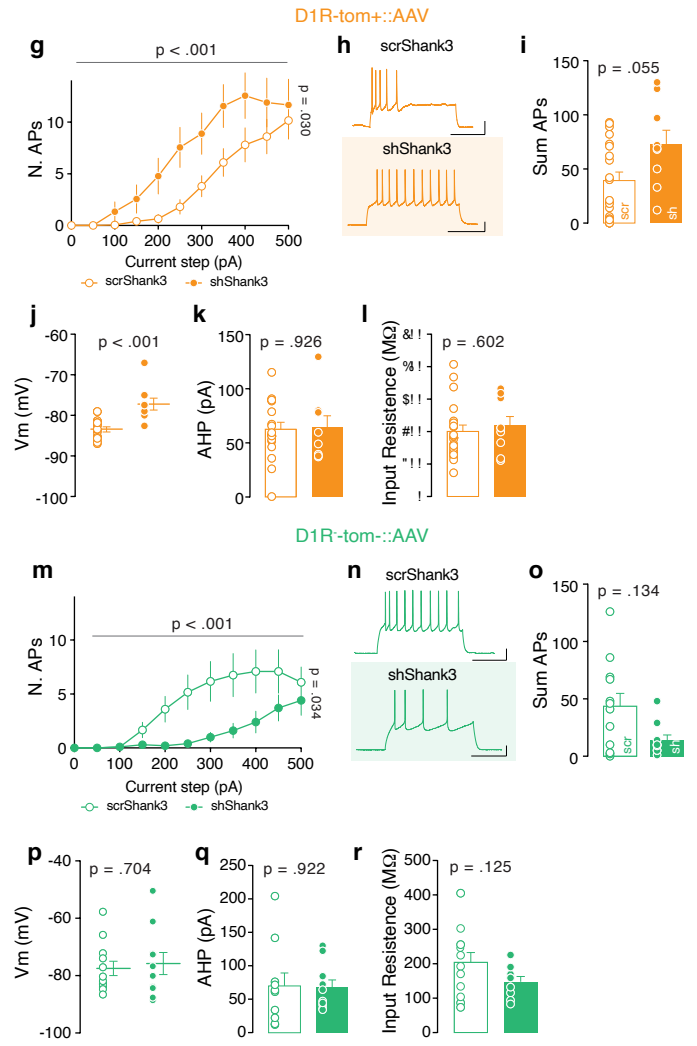

### Synaptic plasticity - D1R MSNs

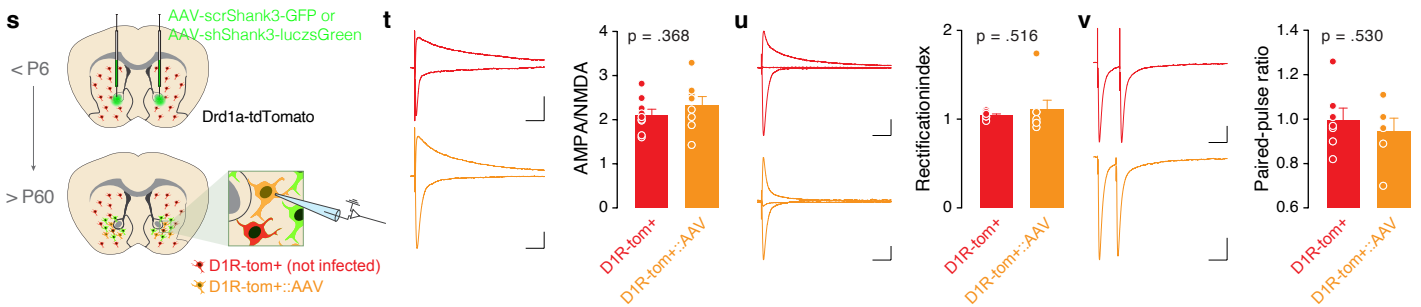

Sup. Figure 3 - Tzanoulinou, Musardo, Contestabile et al

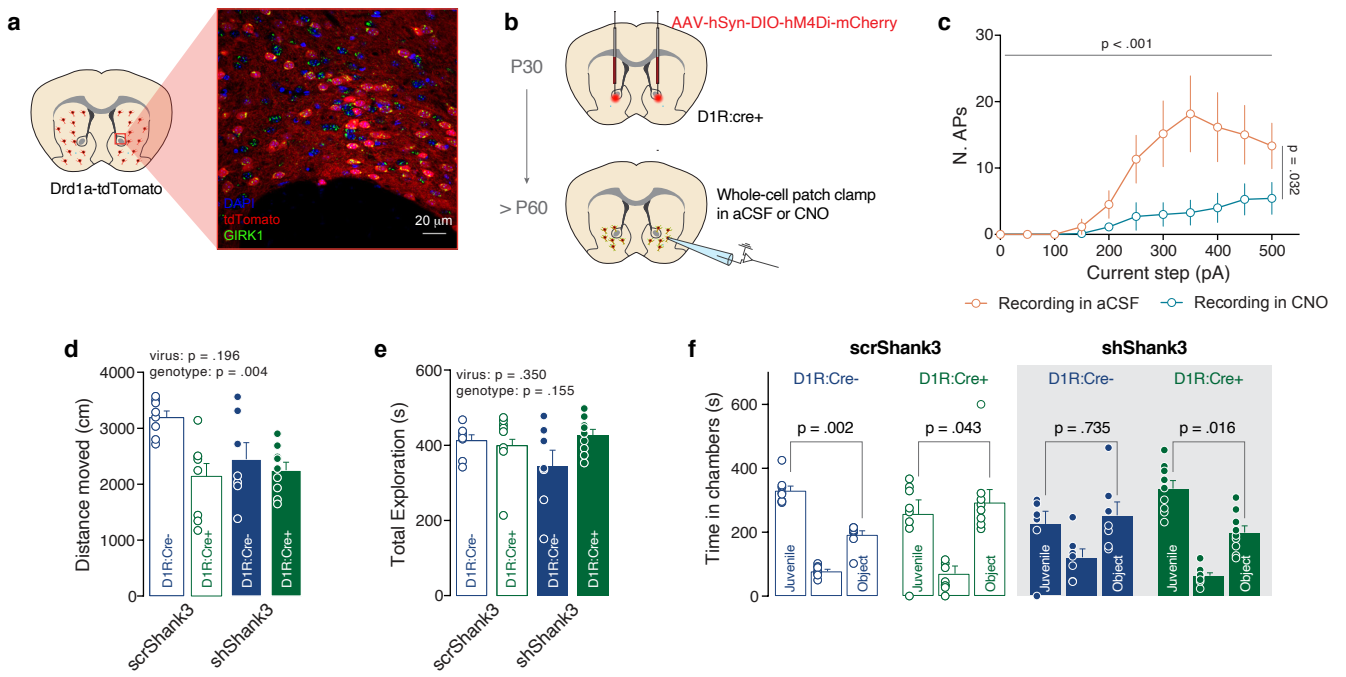

Sup. Figure 4 - Tzanoulinou, Musardo, Contestabile et al

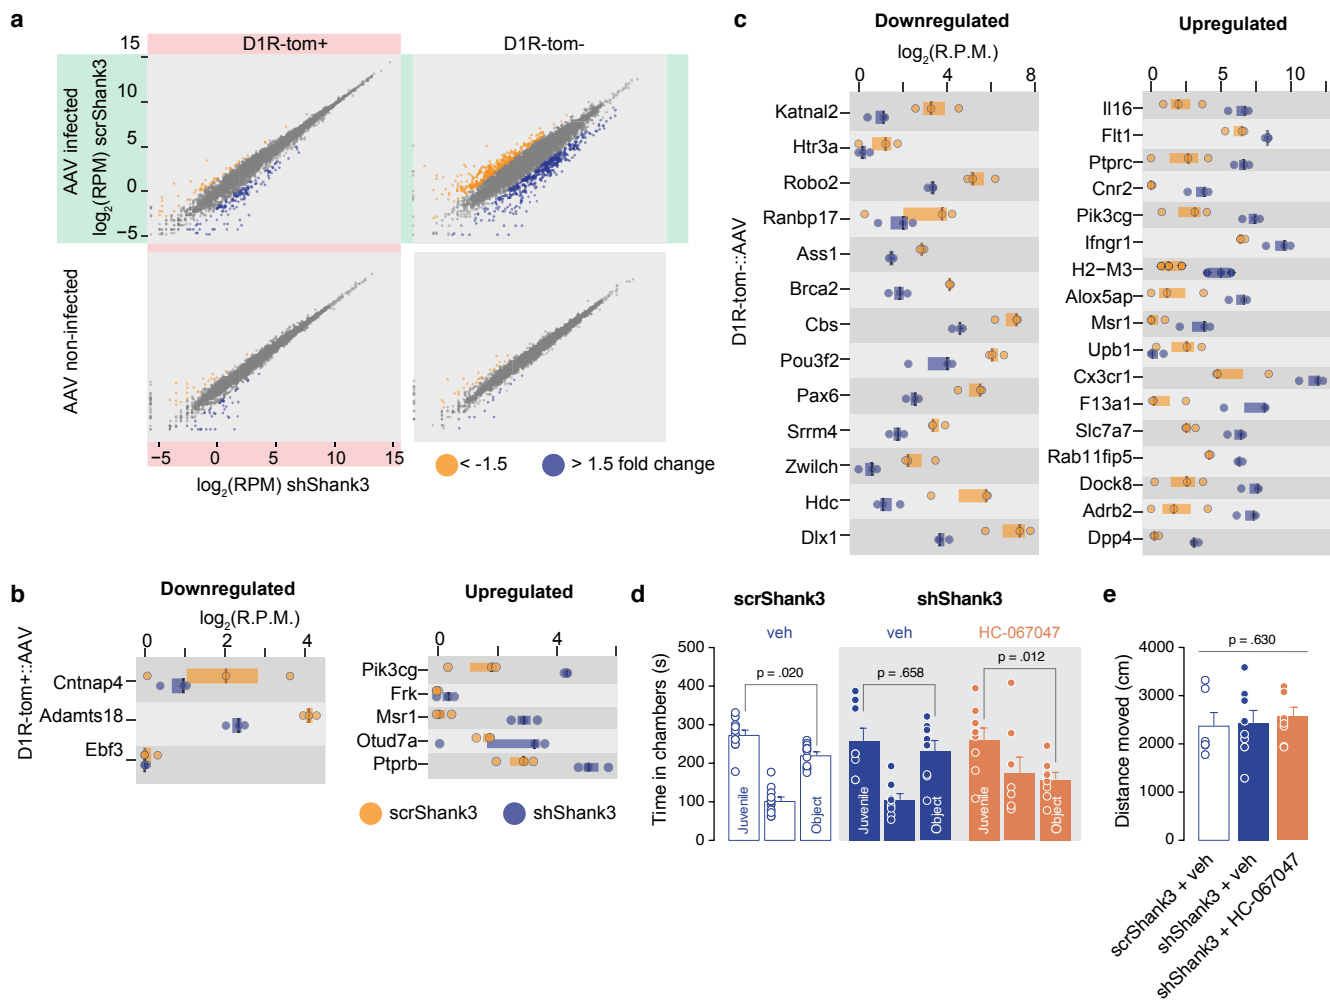

Sup. Figure 5 - Tzanoulinou, Musardo, Contestabile et al

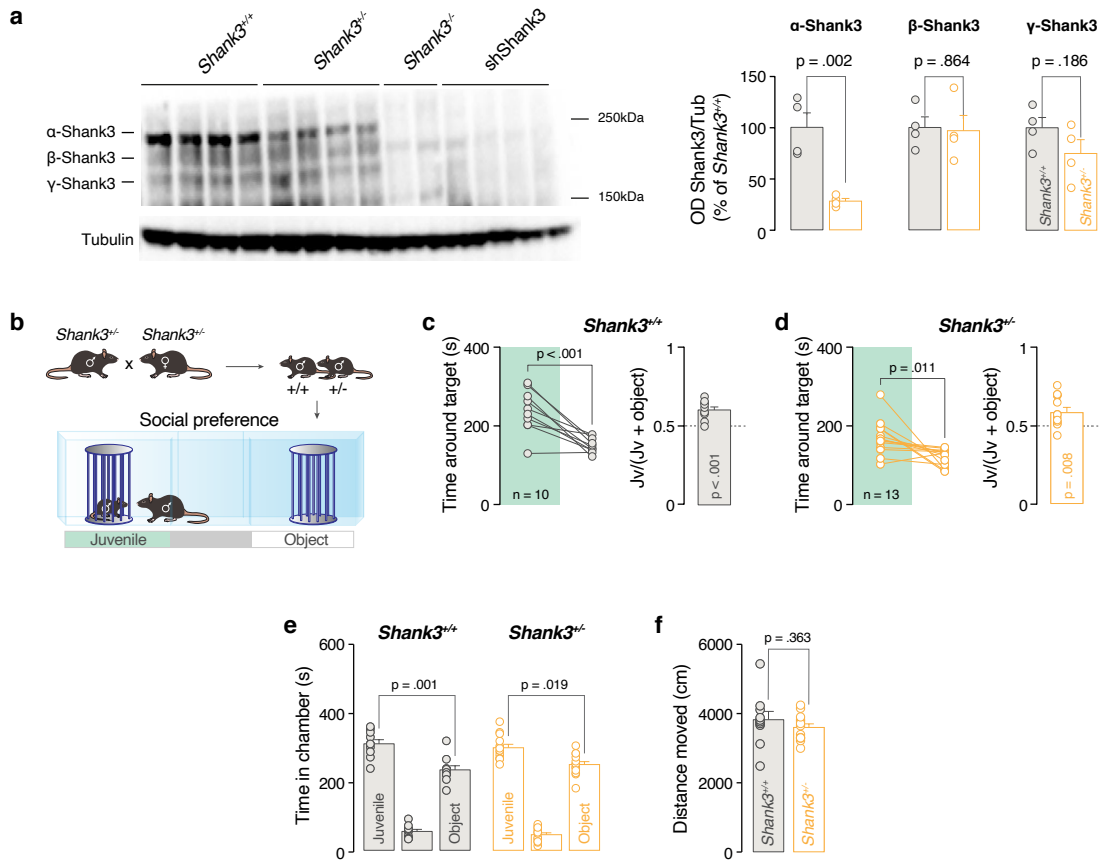

Sup. Figure 6 - Tzanoulinou, Musardo, Contestabile et al

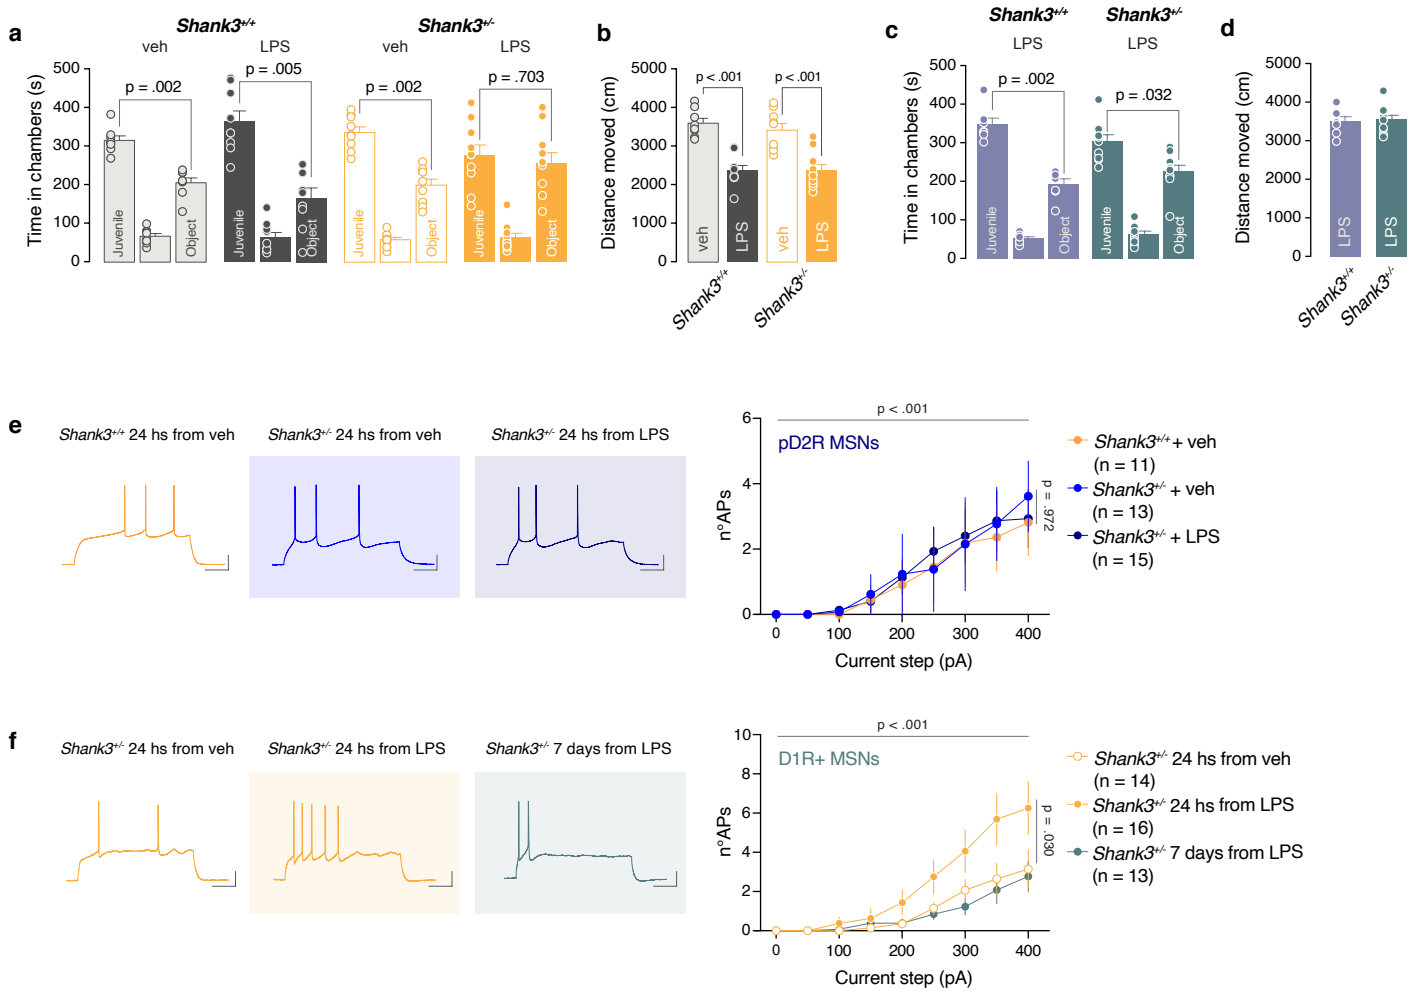

Sup. Figure 7 - Tzanoulinou, Musardo, Contestabile et al

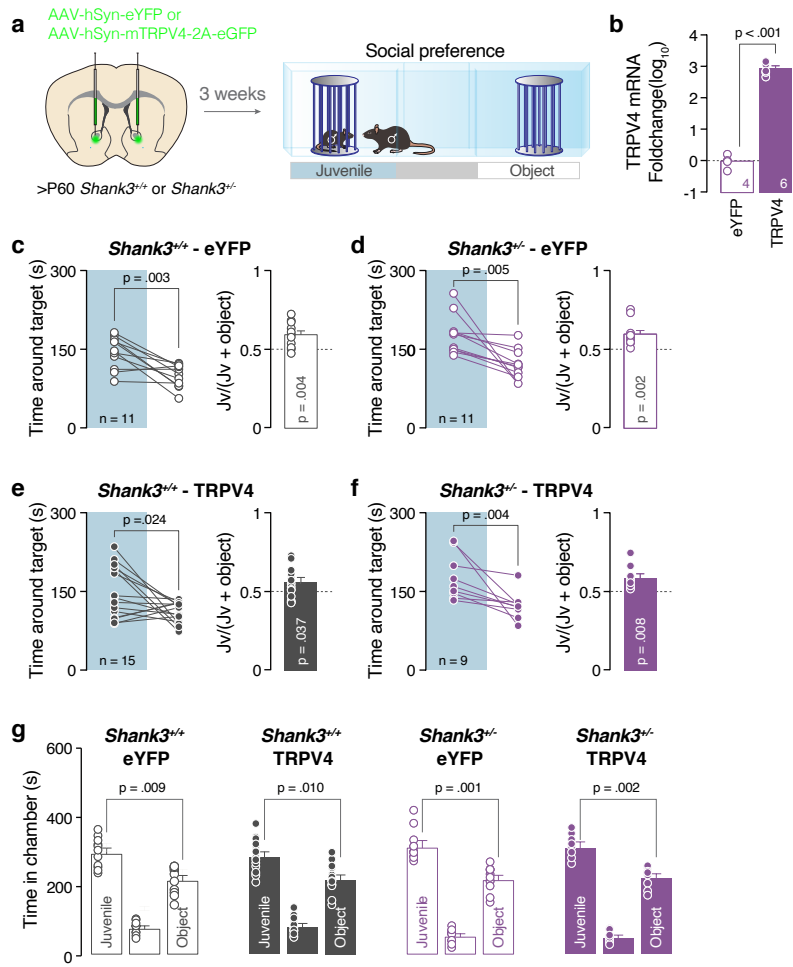

Sup. Figure 8 - Tzanoulinou, Musardo, Contestabile et al



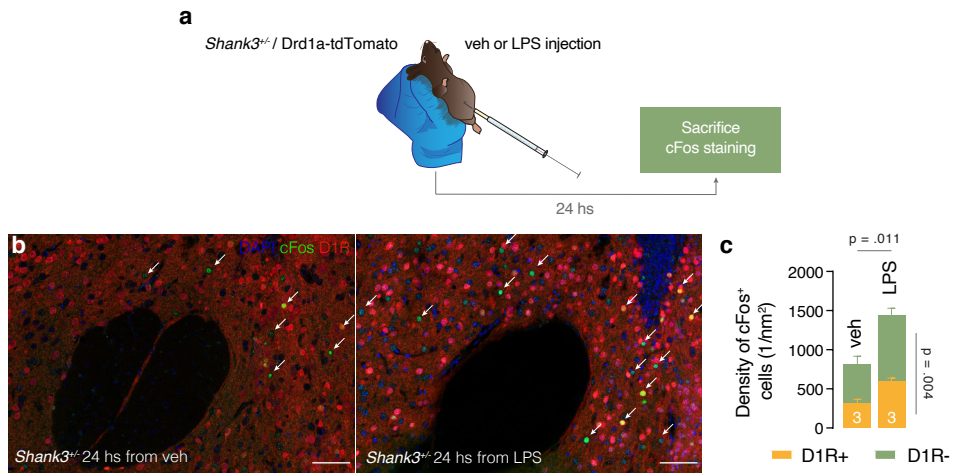

Sup. Figure 9 - Tzanoulinou, Musardo, Contestabile et al

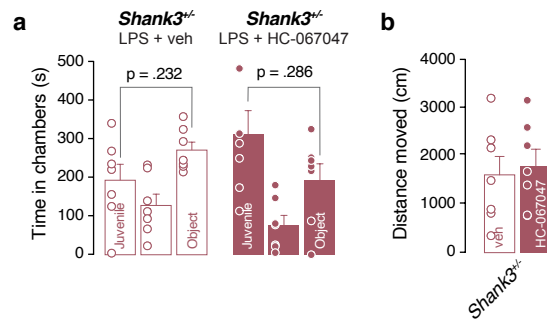

Sup. Figure 10 - Tzanoulinou, Musardo, Contestabile et al
